# Supplementary material for: Interband electronic transitions and optical phonon modes in size-dependent multiferroic BiFeO3 nanoparticles
Source: Royal Society of Chemistry journal article supplement (doi:10.1039/d3cp05267b), 2024-01-01
Supplement: d3cp05267b1.pdf [file d3cp05267b1.pdf]

## Supporting Information

### Interband Electronic Transitions and Optical Phonon modes in Size dependent Multiferroic BiFeO<sub>3</sub> Nanoparticles

Priyambada Sahoo, Ambesh Dixit\*

Advanced Materials and Devices (A-MAD) Laboratory, Department of Physics, Indian Institute of Technology Jodhpur, Rajasthan, 342037, India

\* [ambesh@iitj.ac.in](mailto:ambesh@iitj.ac.in)

**Table S1:** Structural parameters obtained from Rietveld refinement of BiFeO<sub>3</sub> nanoparticles annealed at different temperature.

| Sample (BiFeO <sub>3</sub> NPs) | Phase | Cell parameters                                                                                                                                                        | Atom    | x       | y       | z       | B <sub>iso</sub> (Å <sup>2</sup> ) | Occupancy | R-factor        |
|---------------------------------|-------|------------------------------------------------------------------------------------------------------------------------------------------------------------------------|---------|---------|---------|---------|------------------------------------|-----------|-----------------|
| T = 350 °C                      | R3C   | $a = 5.579012 \text{ \AA}$ ,<br>$b = 5.579012 \text{ \AA}$ ,<br>$c = 13.861478 \text{ \AA}$ ,<br>$\alpha = 90^\circ$ ,<br>$\beta = 90^\circ$ ,<br>$\gamma = 120^\circ$ | Bi (6a) | 0.00000 | 0.00000 | 0.00041 | 0.07295                            | 1         | $R_p = 17.7$    |
|                                 |       |                                                                                                                                                                        | Fe (6a) | 0.00000 | 0.00000 | 0.22151 | 0.11845                            | 1         | $R_{wp} = 14.9$ |
|                                 |       |                                                                                                                                                                        | O (18a) | 0.44689 | 0.01224 | 0.95136 | 0.14897                            | 3         | $\chi^2 = 3.44$ |
| T = 400 °C                      | R3C   | $a = 5.577868 \text{ \AA}$ ,<br>$b = 5.577868 \text{ \AA}$ ,<br>$c = 13.864196 \text{ \AA}$ ,<br>$\alpha = 90^\circ$ ,<br>$\beta = 90^\circ$ ,<br>$\gamma = 120^\circ$ | Bi (6a) | 0.00000 | 0.00000 | 0.00801 | 0.07180                            | 1         | $R_p = 15.6$    |
|                                 |       |                                                                                                                                                                        | Fe (6a) | 0.00000 | 0.00000 | 0.23027 | 0.14189                            | 1         | $R_{wp} = 12.9$ |
|                                 |       |                                                                                                                                                                        | O (18a) | 0.44731 | 0.01812 | 0.95958 | 0.13933                            | 3         | $\chi^2 = 2.93$ |
| T = 450 °C                      | R3C   | $a = 5.577497 \text{ \AA}$ ,<br>$b = 5.577497 \text{ \AA}$ ,<br>$c = 13.863589 \text{ \AA}$ ,<br>$\alpha = 90^\circ$ ,<br>$\beta = 90^\circ$ ,<br>$\gamma = 120^\circ$ | Bi (6a) | 0.00000 | 0.00000 | 0.00908 | 0.07110                            | 1         | $R_p = 15.1$    |
|                                 |       |                                                                                                                                                                        | Fe (6a) | 0.00000 | 0.00000 | 0.23133 | 0.14573                            | 1         | $R_{wp} = 12.8$ |
|                                 |       |                                                                                                                                                                        | O (18a) | 0.44414 | 0.01034 | 0.96011 | 0.10811                            | 3         | $\chi^2 = 3.19$ |
| T = 500 °C                      | R3C   | $a = 5.577722 \text{ \AA}$ ,<br>$b = 5.577722 \text{ \AA}$ ,<br>$c = 13.865355 \text{ \AA}$ ,<br>$\alpha = 90^\circ$ ,<br>$\beta = 90^\circ$ ,<br>$\gamma = 120^\circ$ | Bi (6a) | 0.00000 | 0.00000 | 0.00940 | 0.08350                            | 1         | $R_p = 15.4$    |
|                                 |       |                                                                                                                                                                        | Fe (6a) | 0.00000 | 0.00000 | 0.23128 | 0.13815                            | 1         | $R_{wp} = 13.3$ |
|                                 |       |                                                                                                                                                                        | O (18a) | 0.44444 | 0.00840 | 0.96013 | 0.10442                            | 3         | $\chi^2 = 3.51$ |
| T = 550 °C                      | R3C   | $a = 5.57868 \text{ \AA}$ ,<br>$b = 5.57868 \text{ \AA}$ ,<br>$c = 13.870449 \text{ \AA}$ ,<br>$\alpha = 90^\circ$ ,<br>$\beta = 90^\circ$ ,<br>$\gamma = 120^\circ$   | Bi (6a) | 0.00000 | 0.00000 | 0.00929 | 0.09085                            | 1         | $R_p = 16.4$    |
|                                 |       |                                                                                                                                                                        | Fe (6a) | 0.00000 | 0.00000 | 0.23086 | 0.12411                            | 1         | $R_{wp} = 13.8$ |
|                                 |       |                                                                                                                                                                        | O (18a) | 0.44604 | 0.01220 | 0.96104 | 0.09538                            | 3         | $\chi^2 = 3.07$ |

|            |     |                                                                                                                                                                     |         |         |         |         |         |   |                 |
|------------|-----|---------------------------------------------------------------------------------------------------------------------------------------------------------------------|---------|---------|---------|---------|---------|---|-----------------|
| T = 600 °C | R3C | $a = 5.57915 \text{ \AA}$ ,<br>$b = 5.57915 \text{ \AA}$ ,<br>$c = 13.87190 \text{ \AA}$ ,<br>$\alpha = 90^\circ$ ,<br>$\beta = 90^\circ$ ,<br>$\gamma = 120^\circ$ | Bi (6a) | 0.00000 | 0.00000 | 0.00884 | 0.09709 | 1 | $R_p = 17.7$    |
|            |     |                                                                                                                                                                     | Fe (6a) | 0.00000 | 0.00000 | 0.23019 | 0.12469 | 1 | $R_{wp} = 14.8$ |
|            |     |                                                                                                                                                                     | O (18a) | 0.44531 | 0.01136 | 0.96117 | 0.07228 | 3 | $\chi^2 = 3.43$ |

**Table S2:** Rhombohedral lattice parameters of BiFeO<sub>3</sub> nanoparticles annealed at different temperature.

| T <sub>Calculation</sub> | 350 °C   | 400 °C   | 450 °C   | 500 °C   | 550 °C   | 600 °C   |
|--------------------------|----------|----------|----------|----------|----------|----------|
| $a_{rh}$ (Å)             | 5.632419 | 5.632776 | 5.632493 | 5.63305  | 5.634757 | 5.635312 |
| $\alpha_{rh}$ (°)        | 59.37366 | 59.35612 | 59.35506 | 59.35124 | 59.34267 | 59.34174 |

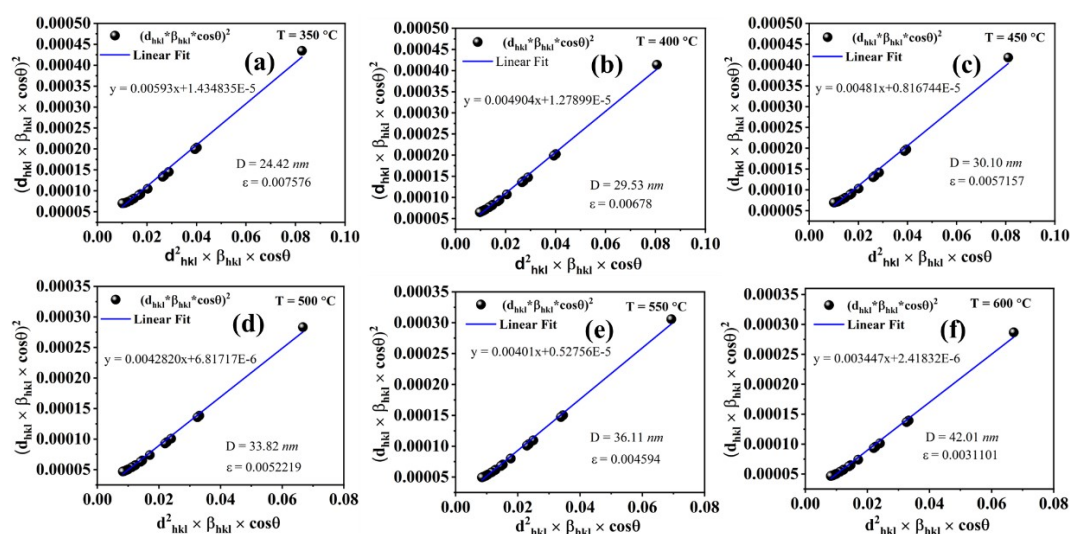

**Figure S1.** Modified W-H plot of BFO NPs annealed at different temperature, with inserted average crystallite size and lattice strain.



| modes   | $T_{\text{Calcination}}$<br>on =<br>350°C | = 400 °C                 | = 450 °C                  | = 500 °C                 | = 550 °C                 | = 600 °C                 | <i>B.K Das et al.)</i> <sup>1</sup> | <i>P. Chen et al.)</i> <sup>2</sup> |
|---------|-------------------------------------------|--------------------------|---------------------------|--------------------------|--------------------------|--------------------------|-------------------------------------|-------------------------------------|
| A1(TO3) | 380.18<br>( $\pm 0.73$ )                  | 379.59<br>( $\pm 0.29$ ) | 380.23<br>( $\pm 0.71$ )  | 379.94<br>( $\pm 0.26$ ) | 380.18<br>( $\pm 1.52$ ) | 380.77<br>( $\pm 0.25$ ) | 319                                 | 318.7                               |
| E(TO6)  | 387.49<br>( $\pm 0.40$ )                  | 389.59<br>( $\pm 0.57$ ) | 387.61<br>( $\pm 0.34$ )  | 389.33<br>( $\pm 1.26$ ) | 389.59<br>( $\pm 0.26$ ) | 389.71<br>( $\pm 1.18$ ) | 356                                 | 351.8                               |
| E(TO7)  | 399.07<br>( $\pm 0.89$ )                  | 401.85<br>( $\pm 0.34$ ) | 399.006<br>( $\pm 2.14$ ) | 409.12<br>( $\pm 0.86$ ) | 409.88<br>( $\pm 0.92$ ) | 409.95<br>( $\pm 0.75$ ) | 372                                 | 385.5                               |
| E(TO8)  | 445.44<br>( $\pm 2.47$ )                  | 448.47<br>( $\pm 0.84$ ) | 443.03<br>( $\pm 2.43$ )  | 444.93<br>( $\pm 1.67$ ) | 442.42<br>( $\pm 1.27$ ) | 442.67<br>( $\pm 1.32$ ) | 442                                 | 444.1                               |
| E(TO9)  | 534.67<br>( $\pm 1.92$ )                  | 540.67<br>( $\pm 5.60$ ) | 534.68<br>( $\pm 1.90$ )  | 540.04<br>( $\pm 4.63$ ) | 540.95<br>( $\pm 4.61$ ) | 542.67<br>( $\pm 3.90$ ) | 520                                 | 536.8                               |
| A1(TO4) | 568.62<br>( $\pm 1.64$ )                  | 579.96<br>( $\pm 2.84$ ) | 568.70<br>( $\pm 1.90$ )  | 579.83<br>( $\pm 3.02$ ) | 580.67<br>( $\pm 2.71$ ) | 582.51<br>( $\pm 2.35$ ) | 547                                 | 575.4                               |

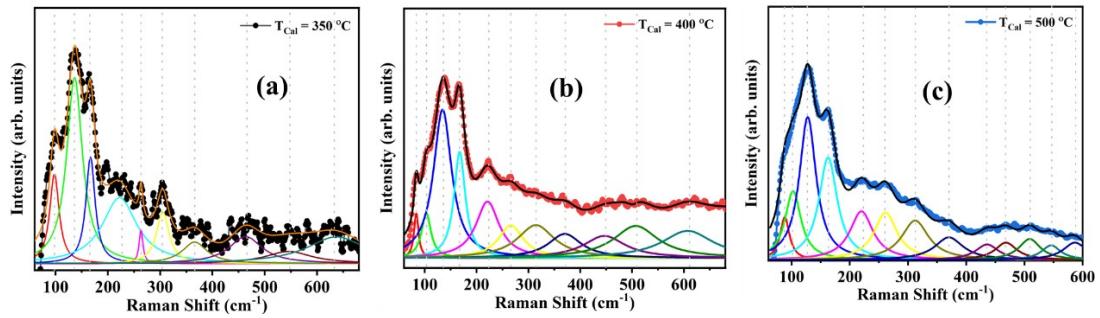

**Figure S4:** Fitted Raman plot of 350 °C (a), 400 °C (b) and 500 °C (c) annealed BiFeO<sub>3</sub> nanoparticles.

**Table S4:** List of room temperature Raman modes from different annealed BiFeO<sub>3</sub> nanoparticles sample.

| Raman Shift (mode)   | $T_{\text{Calcination}} = 350 \text{ }^\circ\text{C}$ | $T_{\text{Calcination}} = 400 \text{ }^\circ\text{C}$ | $T_{\text{Calcination}} = 500 \text{ }^\circ\text{C}$ | $T_{\text{Calcination}} = 600 \text{ }^\circ\text{C}$ |
|----------------------|-------------------------------------------------------|-------------------------------------------------------|-------------------------------------------------------|-------------------------------------------------------|
| E(TO1)               | -                                                     | 83.60                                                 | 88.20                                                 | 83.78                                                 |
| E(TO2)               | 97.70                                                 | 102.91                                                | 102.43                                                | 108.23                                                |
| A1(TO <sub>1</sub> ) | 136.22                                                | 136.89                                                | 127.66                                                | 136.49                                                |
| E(TO3)               | 166.68                                                | 167.71                                                | 162.66                                                | 166.90                                                |
| E(TO4)               | 222.38                                                | 223.83                                                | 223.37                                                | 220.05                                                |

|         |        |         |        |        |
|---------|--------|---------|--------|--------|
| A1(TO2) | 263.28 | 264.82  | 259.45 | 262.55 |
| E(TO5)  | 304.83 | 315.011 | 312.18 | 313.18 |
| A1(TO3) | 366.01 | 371.13  | 370.22 | 371.69 |
| E(TO6)  | -      | 446.33  | 435.71 | 429.60 |
| E(TO7)  | 463.47 | -       | 468.17 | 468.62 |
| E(TO8)  | 545.83 | 508.53  | 508.99 | 529.77 |
| E(TO9)  | -      | -       | 545.81 | 568.03 |
| A1(TO4) | 637.08 | 611.86  | 586.73 | 605.13 |

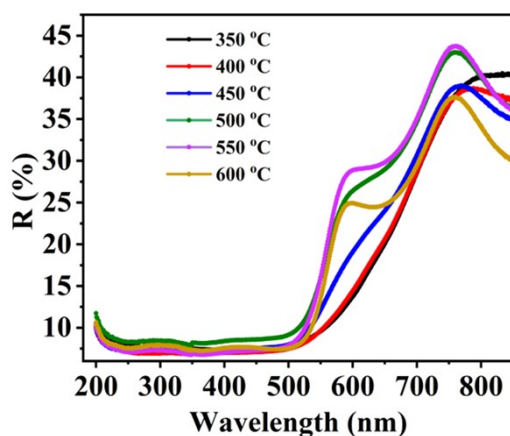

**Figure S5.** UV-Vis Reflectance versus Wavelength plot of different annealed BiFeO<sub>3</sub> nanoparticles

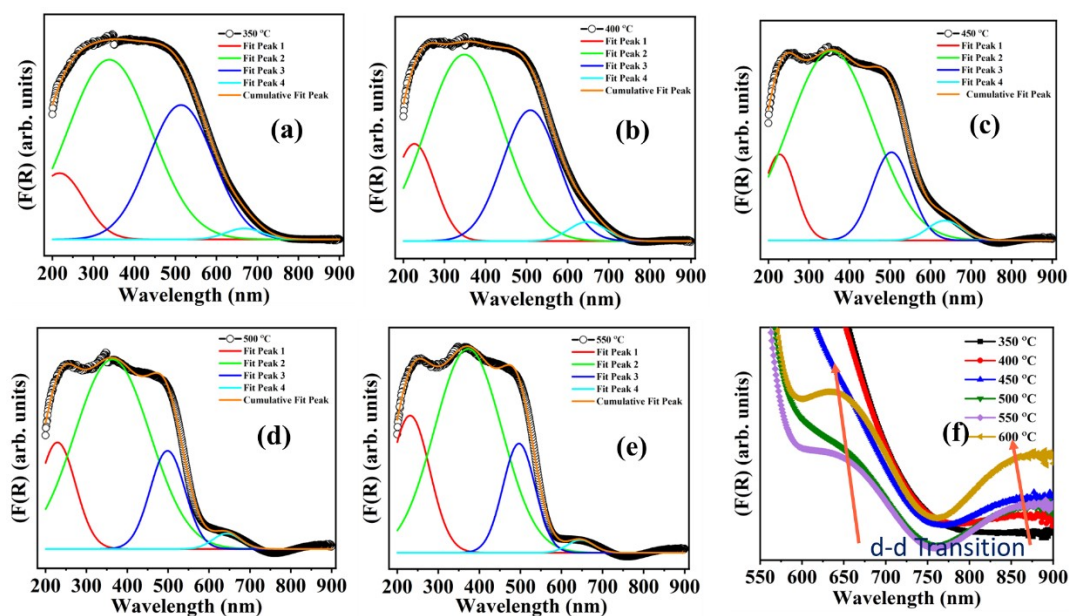

**Figure S6:** (a-e) Plot of Kubelka-Munk function (F(R)) with the wavelength of BiFeO<sub>3</sub> nanoparticles ( $T_{\text{Calcination}} = 350\text{ }^{\circ}\text{C}, 400\text{ }^{\circ}\text{C}, 450\text{ }^{\circ}\text{C}, 500\text{ }^{\circ}\text{C}, 550\text{ }^{\circ}\text{C}$ ) and (f) enlarge view of F(R) vs. wavelength, showing shifting of d-d transition to lower wavelength.

## Reference

- 1 B. K. Das, B. Ramachandran, A. Dixit, M. S. Ramachandra Rao, R. Naik, A. T. Sathyanarayana, T. N. Sairam and G. Amarendra, *J. Alloys Compd.*, 2020, **832**, 154754.
- 2 P. Chen, X. Xu, C. Koenigsmann, A. C. Santulli, S. S. Wong and J. L. Musfeldt, *Nano Lett.*, 2010, **10**, 4526–4532.
